# Supplementary figures and images for: A novel series of rhenium-bipyrimidine complexes: synthesis, crystal structure and electrochemical properties
Source: Royal Society of Chemistry journal article supplement (doi:10.1039/b615136a), 2007-01-01

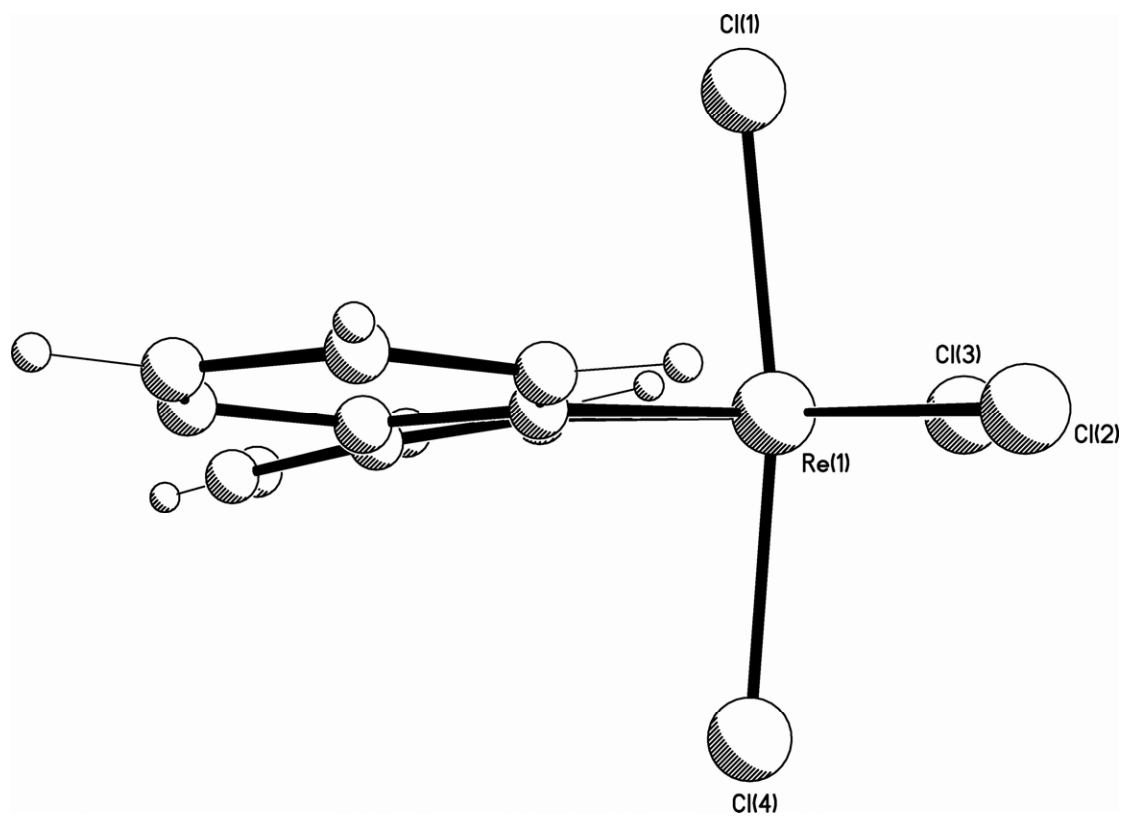

Figure S1

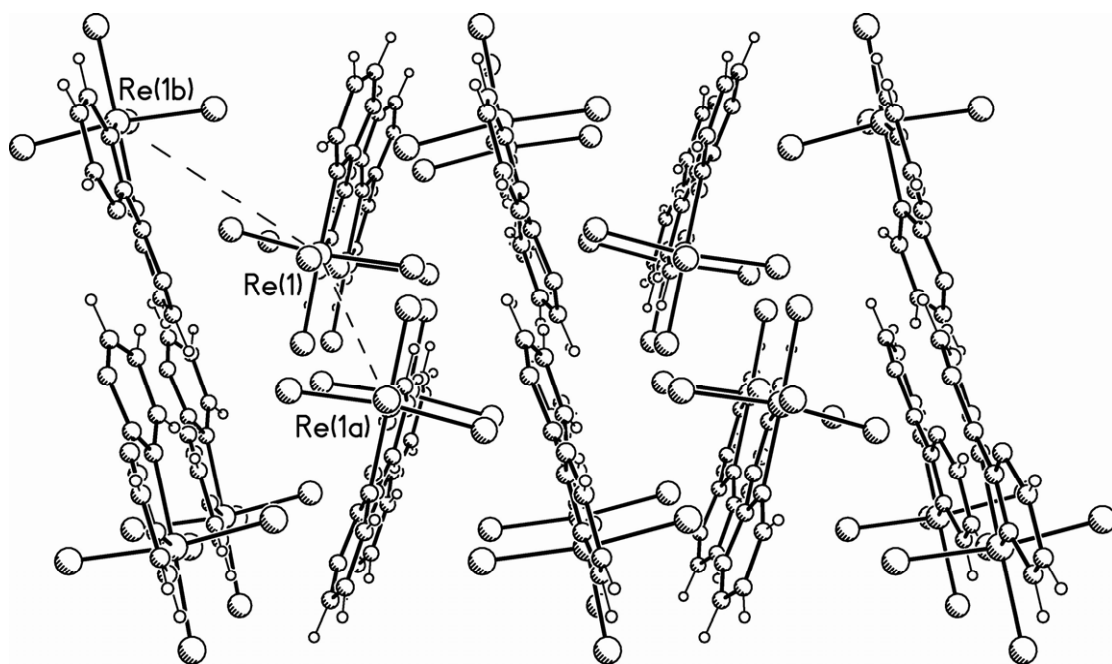

Figure S2

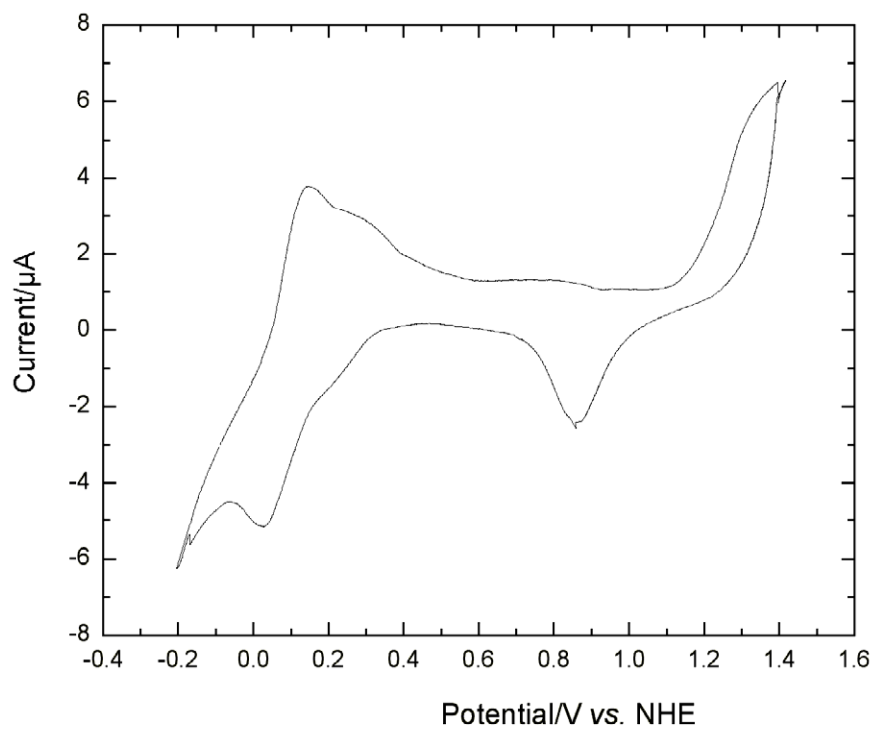

**Figure S3**

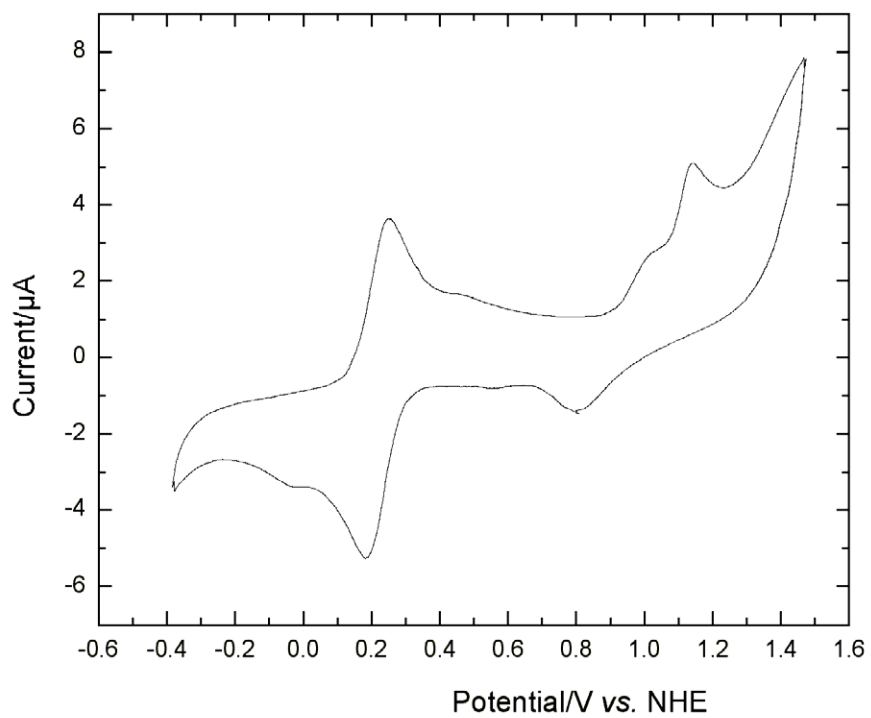

**Figure S4**

Supplement: b615136a.pdf [file b615136a.pdf]
